# Supplementary material for: Self-Assessment Adaptive Capacity Indicators of Health Risks from Air Pollution
Source: MDPI journal article supplement (doi:10.3390/su132313141), 2021-11-27
Supplement: s1 [file s1]

Archive with 1 entries (1 files):
- sustainability-1410088-supplementary.pdf
