# Supplementary material for: Self-Assessment Adaptive Capacity Indicators of Health Risks from Air Pollution
Source: MDPI journal article supplement (doi:10.3390/su132313141), 2021-11-27
Supplement: s1 [file s1 › sustainability-1410088-supplementary.pdf]

## Questionnaire II: Current behaviors to mitigate health risks from air pollution

### 1: Demographics and generic information

#### 1.1 Gender

☐ Male

☐ Female

#### 1.2 Age (years) .....

#### 1.3 Education level

☐ Below primary

☐ Primary school

☐ Lower Secondary

☐ Upper secondary

☐ University

#### 1.4 Occupation .....

#### 1.5 Place of work/residence & location .....

| ID | APAC indicator                                                                                            |       |                                                                                                                                  |
|----|-----------------------------------------------------------------------------------------------------------|-------|----------------------------------------------------------------------------------------------------------------------------------|
|    |                                                                                                           | Score | Description                                                                                                                      |
| A1 | Avoid leaving place of residence without proper protection when AQI levels are too high (AQI > 101).      | 0     | Stay outside of place of residence or work longer than 3 hours daily although the AQI levels exceed safety limits.               |
|    |                                                                                                           | 1     | Stay outside of place of residence or work for 2 - 3 hours daily although the AQI levels exceed safety limits.                   |
|    |                                                                                                           | 2     | Stay outside of place of residence or work for 1 - 2 hours daily although the AQI levels exceed safety limits.                   |
|    |                                                                                                           | 3     | Stay outside of place of residence or work less than 1 hour daily when the AQI levels exceed safety limits.                      |
|    |                                                                                                           | 4     | Minimize leaving place of residence or work when the AQI levels exceed safety limits.                                            |
|    |                                                                                                           | 5     | Avoid leaving place of residence or work when the AQI levels exceed safety limits.                                               |
| A2 | Wear an N95 mask or equivalent when engaging in outdoor activity and AQI levels are too high (AQI > 101). | 0     | Never wear an N95 mask while outdoors although the AQI levels exceed safety limits.                                              |
|    |                                                                                                           | 1     | Rarely wear a face mask while outdoors when the AQI levels exceed safety limits. The face mask is not of N95 or equivalent type. |
|    |                                                                                                           | 2     | Rarely wear a face mask while outdoors when the AQI levels exceed safety limits. The face mask is of N95 or equivalent type.     |
|    |                                                                                                           | 3     | Occasionally wear an N95 face mask while outdoors when the AQI levels exceed safety limits.                                      |
|    |                                                                                                           | 4     | Always wear either N95 or ordinary face mask while outdoors when the AQI levels exceed safety limits.                            |

| ID | APAC indicator                                                                                                                                                                                            |       |                                                                                                                          |
|----|-----------------------------------------------------------------------------------------------------------------------------------------------------------------------------------------------------------|-------|--------------------------------------------------------------------------------------------------------------------------|
|    |                                                                                                                                                                                                           | Score | Description                                                                                                              |
|    |                                                                                                                                                                                                           | 5     | Always wear an N95 face mask while outdoors when the AQI levels exceed safety limits.                                    |
| A3 | Apply sunscreen products with PA+++ and SPF30 to protect against UVA and UVB.                                                                                                                             | 0     | Never apply sunscreen products to protect against UV rays.                                                               |
|    |                                                                                                                                                                                                           | 1     | Rarely apply sunscreen products to protect against UV rays. The sunscreen properties are below PA+++ and SPF30.          |
|    |                                                                                                                                                                                                           | 2     | Rarely apply sunscreen products to protect against UV rays. If applied, the sunscreens are of PA+++ and SPF30 or higher. |
|    |                                                                                                                                                                                                           | 3     | Occasionally apply sunscreen products with PA+++ and SPF30 to protect against UV rays.                                   |
|    |                                                                                                                                                                                                           | 4     | Always apply sunscreen products with PA+++ and SPF30 or higher to protect against UV rays.                               |
|    |                                                                                                                                                                                                           | 5     | Always apply sunscreen products with PA+++ and SPF30 or higher to protect against UV rays; and re-apply every 4 hours.   |
| A4 | Adopt diet regimens that lower oxidative stress.                                                                                                                                                          | 0     | No diet regimen to lower oxidative stress. In other word, select diets based on price and taste.                         |
|    |                                                                                                                                                                                                           | 1     | Proportion of healthy diets is substantially smaller than unhealthy diets.                                               |
|    |                                                                                                                                                                                                           | 2     | Proportion of healthy diets is equal to or slightly larger than unhealthy diets.                                         |
|    |                                                                                                                                                                                                           | 3     | Proportion of healthy diets is considerably larger than unhealthy diets.                                                 |
|    |                                                                                                                                                                                                           | 4     | Adopt diet regimen that helps lower oxidative stress.                                                                    |
|    |                                                                                                                                                                                                           | 5     | Adopt diet regimen that helps lower oxidative stress and meets the WHO's guidelines.                                     |
| A5 | Install indoor air filter systems certified by one of the following institutes: the British Allergy Foundation (BAF), the Association of Home Appliance Manufacturers (AHAM), and the European Centre for | 0     | No indoor air filter systems.                                                                                            |
|    |                                                                                                                                                                                                           | 1     | There are indoor air filter systems but not certified by BAF, AHAM, or ECARF.                                            |
|    |                                                                                                                                                                                                           | 2     | There are indoor air filter systems but uncertain whether they are certified by BAF, AHAM, or ECARF.                     |
|    |                                                                                                                                                                                                           | 3     | There are BAF-, AHAM- or ECARF-certified indoor air filter systems but rarely in operation.                              |
|    |                                                                                                                                                                                                           | 4     | There are BAF-, AHAM- or ECARF-certified indoor air filter systems and often in operation.                               |

| ID | APAC indicator                                                                                               |       |                                                                                                                                                                                                                 |
|----|--------------------------------------------------------------------------------------------------------------|-------|-----------------------------------------------------------------------------------------------------------------------------------------------------------------------------------------------------------------|
|    |                                                                                                              | Score | Description                                                                                                                                                                                                     |
|    | Allergy Research Foundation (ECARF).                                                                         | 5     | There are BAF-, AHAM- or ECARF-certified indoor air filter systems and always in operation.                                                                                                                     |
| A6 | Exercise regularly to reduce oxidative stress.                                                               | 0     | Never exercise.                                                                                                                                                                                                 |
|    |                                                                                                              | 1     | Exercise fewer than 2 days a week and less than 30 minutes each.                                                                                                                                                |
|    |                                                                                                              | 2     | Exercise 2 - 3 days a week and less than 30 minutes each.                                                                                                                                                       |
|    |                                                                                                              | 3     | Exercise 2 - 3 days a week and more than 30 minutes each.                                                                                                                                                       |
|    |                                                                                                              | 4     | Exercise 3 or more days a week or more than 150 minutes per week.                                                                                                                                               |
|    |                                                                                                              | 5     | Indoor exercise 3 or more days a week or more than 150 minutes per week. The exercise plan includes both cardio and weight training                                                                             |
| A7 | Take a shower and change into new clothes upon returning to place of residence (following outdoor activity). | 0     | Never take a shower or change into new clothes after returning to place of residence.                                                                                                                           |
|    |                                                                                                              | 1     | Take a shower and change into new clothes more than 3 hours after returning to place of residence.                                                                                                              |
|    |                                                                                                              | 2     | Take a shower and change into new clothes within 3 hours after returning to place of residence.                                                                                                                 |
|    |                                                                                                              | 3     | Take a shower and change into new clothes within 2 hours after returning to place of residence.                                                                                                                 |
|    |                                                                                                              | 4     | Take a shower and change into new clothes within 1 hour after returning to place of residence.                                                                                                                  |
|    |                                                                                                              | 5     | Take a shower or change into new clothes upon returning to place of residence.                                                                                                                                  |
| A8 | Take dietary supplements to reduce oxidative stress.                                                         | 0     | Never take dietary supplements to reduce oxidative stress.                                                                                                                                                      |
|    |                                                                                                              | 1     | Rarely take dietary supplements and uncertain whether the supplements help reduce oxidative stress.                                                                                                             |
|    |                                                                                                              | 2     | Occasionally take dietary supplements and uncertain whether the supplements help reduce oxidative stress.                                                                                                       |
|    |                                                                                                              | 3     | Occasionally take dietary supplements that help reduce oxidative stress, including Vitamin A and Beta-carotene, Vitamin C, Vitamin E, Vitamin B6, B12, folic acid, Omega-3, Sulforaphane and N-acetyl cysteine. |

| ID  | APAC indicator                                                                                                                      |       |                                                                                                                                                                                                                                                                          |
|-----|-------------------------------------------------------------------------------------------------------------------------------------|-------|--------------------------------------------------------------------------------------------------------------------------------------------------------------------------------------------------------------------------------------------------------------------------|
|     |                                                                                                                                     | Score | Description                                                                                                                                                                                                                                                              |
|     |                                                                                                                                     | 4     | Regularly take dietary supplements that help reduce oxidative stress, including Vitamin A and Beta-carotene, Vitamin C, Vitamin E, Vitamin B6, B12, folic acid, Omega-3, Sulforaphane and N-acetyl cysteine.                                                             |
|     |                                                                                                                                     | 5     | Regularly take dietary supplements that help reduce oxidative stress, including Vitamin A and Beta-carotene, Vitamin C, Vitamin E, Vitamin B6, B12, folic acid, Omega-3, Sulforaphane and N-acetyl cysteine, in addition to dietary supplements with high antioxiations. |
| A9  | Avoid outdoor exercise and/or activities when AQI levels are too high (AQI > 101).                                                  | 0     | Engage in outdoor activities or sports longer than 3 hours although the AQI levels exceed safety limits.                                                                                                                                                                 |
|     |                                                                                                                                     | 1     | Engage in outdoor activities or sports between 2 - 3 hours although the AQI levels exceed safety limits.                                                                                                                                                                 |
|     |                                                                                                                                     | 2     | Engage in outdoor activities or sports between 1 - 2 hours although the AQI levels exceed safety limits.                                                                                                                                                                 |
|     |                                                                                                                                     | 3     | Engage in outdoor activities or sports less than 1 hour when the AQI levels exceed safety limits.                                                                                                                                                                        |
|     |                                                                                                                                     | 4     | Minimize engagement in outdoor activities or sports when the AQI levels exceed safety limits.                                                                                                                                                                            |
|     |                                                                                                                                     | 5     | Avoid outdoor activities or sports when the AQI levels exceed safety limits.                                                                                                                                                                                             |
| A10 | Stay hydrated by drinking clean water every 2 – 3 hours, and the recommended quantity is 1.5 liters/day (8 - 10 glasses) for adult. | 0     | Daily consumption of water is alarmingly below the recommended quantity of 1.5 liters.                                                                                                                                                                                   |
|     |                                                                                                                                     | 1     | Daily consumption of water is infrequent (>4 hours) and substantially below the recommended daily quantity.                                                                                                                                                              |
|     |                                                                                                                                     | 2     | Daily consumption of water is less frequent (every 3-4 hours) and below the recommended daily quantity.                                                                                                                                                                  |
|     |                                                                                                                                     | 3     | Daily consumption of water is somewhat frequent (every 3 hours) but still below the recommended daily quantity.                                                                                                                                                          |
|     |                                                                                                                                     | 4     | Daily consumption of water is adequate (every 2-3 hours) but still below the recommended daily quantity.                                                                                                                                                                 |
|     |                                                                                                                                     | 5     | Daily consumption of water is adequate (every 2-3 hours or less) and meets the recommended daily quantity.                                                                                                                                                               |
| A11 | Elderly individuals with preexisting health conditions should avoid                                                                 | 0     | You are over 60 years of age with many preexisting health conditions.                                                                                                                                                                                                    |
|     |                                                                                                                                     | 1     | You are over 60 years of age with certain chronic illnesses.                                                                                                                                                                                                             |

| ID  | APAC indicator                                                                                                  |       |                                                                                                                                 |
|-----|-----------------------------------------------------------------------------------------------------------------|-------|---------------------------------------------------------------------------------------------------------------------------------|
|     |                                                                                                                 | Score | Description                                                                                                                     |
|     | exposure to air pollution.                                                                                      | 2     | You are under 60 years of age with certain chronic illnesses.                                                                   |
|     |                                                                                                                 | 3     | You are over 60 years of age with few chronic illnesses.                                                                        |
|     |                                                                                                                 | 4     | You are under 60 years of age with few chronic illnesses.                                                                       |
|     |                                                                                                                 | 5     | You are under 60 years of age and without preexisting health conditions.                                                        |
|     |                                                                                                                 |       |                                                                                                                                 |
| A12 | Aware of the health impacts of air pollution and equip oneself with relevant knowledge to mitigate the impacts. | 0     | Lack of awareness of the health impacts of air pollution and no actions taken to mitigate the impacts.                          |
|     |                                                                                                                 | 1     | Minimal awareness of the health impacts of air pollution and few actions taken to mitigate the impacts.                         |
|     |                                                                                                                 | 2     | Incomplete awareness of the health impacts of air pollution and certain actions occasionally taken to mitigate the impacts.     |
|     |                                                                                                                 | 3     | Sufficient awareness of the health impacts of air pollution and necessary actions taken to mitigate the impacts.                |
|     |                                                                                                                 | 4     | Complete awareness of the health impacts of air pollution and actions (both proper and improper) taken to mitigate the impacts. |
|     |                                                                                                                 | 5     | Complete awareness of the health impacts of air pollution and proper actions taken to mitigate the impacts.                     |
